# Supplementary material for: Mesothelin-targeting T cell receptor fusion construct cell therapy in refractory solid tumors: phase 1/2 trial interim results
Source: PubMed Central journal article supplement (PMC10427427; doi:10.1038/s41591-023-02452-y), 2023-07-27
Supplement: 41591_2023_2452_MOESM1_ESM.pdf [file 41591_2023_2452_MOESM1_ESM.pdf]

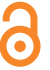

---

# Mesothelin-targeting T cell receptor fusion construct cell therapy in refractory solid tumors: phase 1/2 trial interim results

---

In the format provided by the authors and unedited

---

## **TABLE OF CONTENTS**

### **SUPPLEMENTARY TABLES**

Table S1. Detection of TRuC-T cells in serosal effusions by qPCR

Table S2. Anti-drug antibodies pre- and post- infusion of gavo-cel

### **SUPPLEMENTARY FIGURES**

Supplementary Fig. 1, Mesothelin expression in tumor biopsies.

Supplementary Fig. 2, Graphical representation of change in metabolic tumor volume and total lesion glycolysis in a patient with MPM experiencing partial response.

Supplementary Fig. 3, Kinetics of plasma cytokine release post gavo-cel infusion.

Supplementary Fig. 4, Kinetics of plasma cytokine release post gavo-cel infusion.

Supplementary Fig. 5, Gavo-cel expansion in responders vs non-responders.

Supplementary Fig. 6, Quantitative imaging analysis of multiplex immunofluorescence assay.

Supplementary Fig. 7, Representative gating strategy used for analysis of flow cytometry data.

### **NR\_REPORTING\_SUMMARY**

### **SOURCE DATA: SUPPLEMENTARY FIGURES**

**SUPPLEMENTARY TABLES**

**Table S1. Detection of TRuC-T cells in serosal effusions by qPCR**

| Copies/ $\mu$ g gDNA in Serosal effusion |      |               | Copies/ $\mu$ g gDNA in Blood |                  |                             |
|------------------------------------------|------|---------------|-------------------------------|------------------|-----------------------------|
| Pt#                                      | Days | Copies of DNA | Copies at proximal timepoint  | Peak             | Last day of detectable OPRE |
| 7                                        | 10   | 44791.6       | 186.3 (day 10)                | 712.9 (day21)    | day 66                      |
| 14                                       | 16   | 19670.6       | 242.2 (day 21)                | 14359.7 (day 7)  | day 29                      |
| 20                                       | 76   | 343.7         | 289.1 (day 43)                | 5135.2 (day 9)   | day 43                      |
| 15                                       | 64   | 183.9         | 743.2 (day 57)                | 59425.3 (day 9)  | day 394                     |
| 25                                       | 58   | 148.9         | 97.0 (day 56)                 | 100781.9 (day 7) | day 56                      |
| 25                                       | 70   | 67.7          | Not detected at day 86        | 100781.9 (day 7) | day 56                      |

**Table S2. Anti-drug antibodies pre- and post- infusion of gavo-cel<sup>®</sup>.**

| <b>Patient number</b> | <b>Visit Name</b> | <b>Day</b> | <b>ValueS</b> | <b>ValueC</b> | <b>ValueT</b> |
|-----------------------|-------------------|------------|---------------|---------------|---------------|
| 1                     | Baseline          | -5         | Negative      | Negative      | NA            |
|                       | Week 8            | 49         | Positive      | Positive      | 8             |
| 3                     | Baseline          | -12        | Negative      | Negative      | NA            |
|                       | Week 8            | 60         | Negative      | Negative      | NA            |
| 6                     | Baseline          | -12        | Negative      | Negative      | NA            |
|                       | Week 8            | 56         | Negative      | Negative      | NA            |
| 7                     | Baseline          | -56        | Negative      | Negative      | NA            |
|                       | Week 8            | 56         | Negative      | Negative      | NA            |
| 8                     | Baseline          | -8         | Negative      | Negative      | NA            |
|                       | Week 8            | 56         | Negative      | Negative      | NA            |
| 11                    | Infusion          | 0          | Negative      | Negative      | NA            |
|                       | Week 8            | 56         | Negative      | Negative      | NA            |
| 12                    | Infusion          | 0          | Negative      | Negative      | NA            |
|                       | Week 8            | 56         | Negative      | Negative      | NA            |
| 13                    | Infusion          | 0          | Negative      | Negative      | NA            |
|                       | Week 8            | 58         | Negative      | Negative      | NA            |
| 14                    | Infusion          | 0          | Negative      | Negative      | NA            |
|                       | Week 8            | 56         | Negative      | Negative      | NA            |
| 15                    | Infusion          | 0          | Negative      | Negative      | NA            |
|                       | Week 8            | 57         | Negative      | Negative      | NA            |
| 18                    | Infusion          | 0          | Negative      | Negative      | NA            |
|                       | Week 8            | 55         | Negative      | Negative      | NA            |

|    |          |     |          |          |    |
|----|----------|-----|----------|----------|----|
| 19 | Infusion | 0   | Negative | Negative | NA |
|    | Week 8   | 56  | Negative | Negative | NA |
| 22 | Infusion | 0   | Negative | Negative | NA |
|    | Week 8   | 56  | Negative | Negative | NA |
| 24 | Infusion | 0   | Negative | Negative | NA |
|    | Week 8   | 56  | Negative | Negative | NA |
| 25 | Infusion | 0   | Negative | Negative | NA |
|    | Week 8   | 56  | Negative | Negative | NA |
| 28 | Infusion | 0   | Negative | Negative | NA |
|    | Week 8   | 63  | Negative | Negative | NA |
| 29 | Infusion | 0   | Negative | Negative | NA |
|    | Week 12  | 76  | Negative | Negative | NA |
| 30 | Infusion | 0   | Negative | Negative | NA |
|    | Week 8   | 56  | Negative | Negative | NA |
| 31 | Infusion | 0   | Negative | Negative | NA |
|    | Week 8   | 63  | Negative | Negative | NA |
| 32 | Baseline | -15 | Negative | Negative | NA |
|    | Week 8   | 63  | Negative | Negative | NA |

¶Antibodies against the anti-MSLN MH1 binder moiety contained in the TRuC were measured in plasma pre- and post-infusion using a validated sandwich ELISA method. ValueS: screen result, ValueC: confirmatory result, ValueT: titration result.

## SUPPLEMENTARY FIGURES

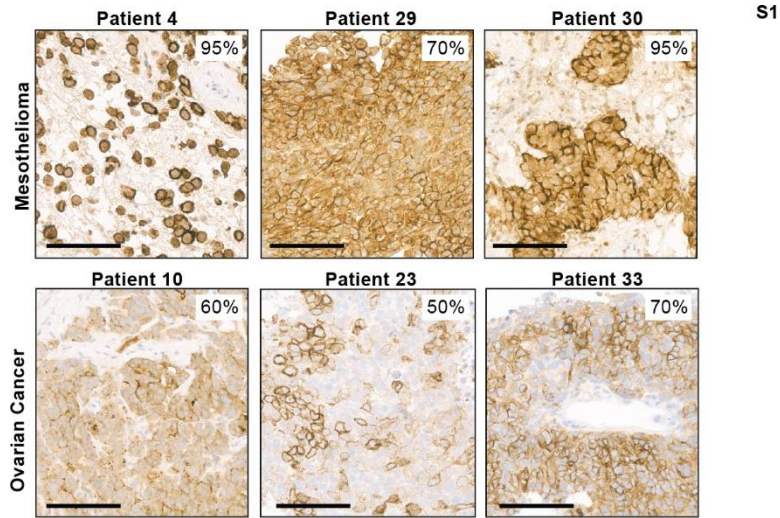

**Supplementary Fig. 1, Mesothelin expression in tumor biopsies.** Representative micrographs of mesothelin immunohistochemistry in **a**, mesothelioma and **b**, ovarian cancer patients. All patients enrolled to the study had mesothelin staining in the tumor compartment that surpassed the threshold of 50% membrane positivity of combined 2+ and 3+, scored by a trained pathologist. Percentage in each patient micrograph represent the proportion of viable tumor cells expressing membranous mesothelin combination 2+ and 3+ intensity. Experiment performed once on independent patient samples. Inset scale bar represents 100  $\mu$ M.

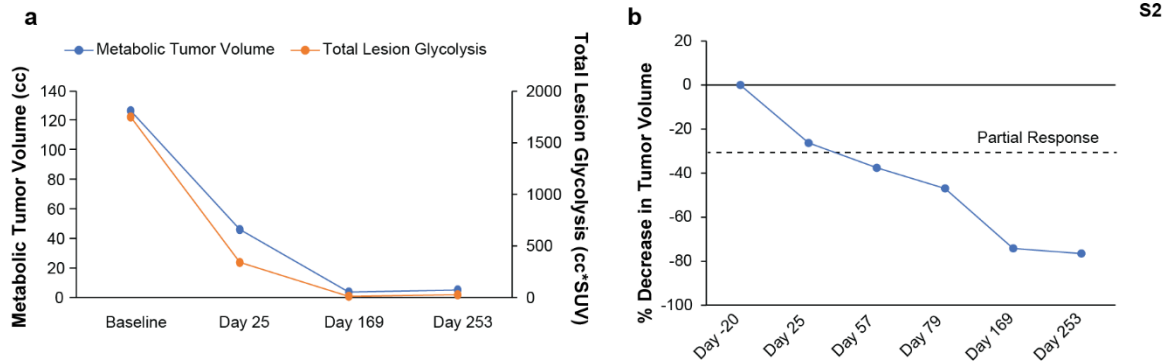

**Supplementary Fig. 2, Graphical representation of change in metabolic tumor volume and total lesion glycolysis in a patient with MPM experiencing partial response. a,** The metabolic tumor volume decreased from 126.7cc at baseline to 5.2cc at day 253. Total lesion glycolysis also went down from 1750.6cc\*SUV to 27.7cc\*SUV. **b,** Progressive decrease in the sum of target tumor lesions as measured by CT scans. The patient achieved a partial response by day 57 and on day 253 had a 76.5% decrease in the sum of tumor target lesions.

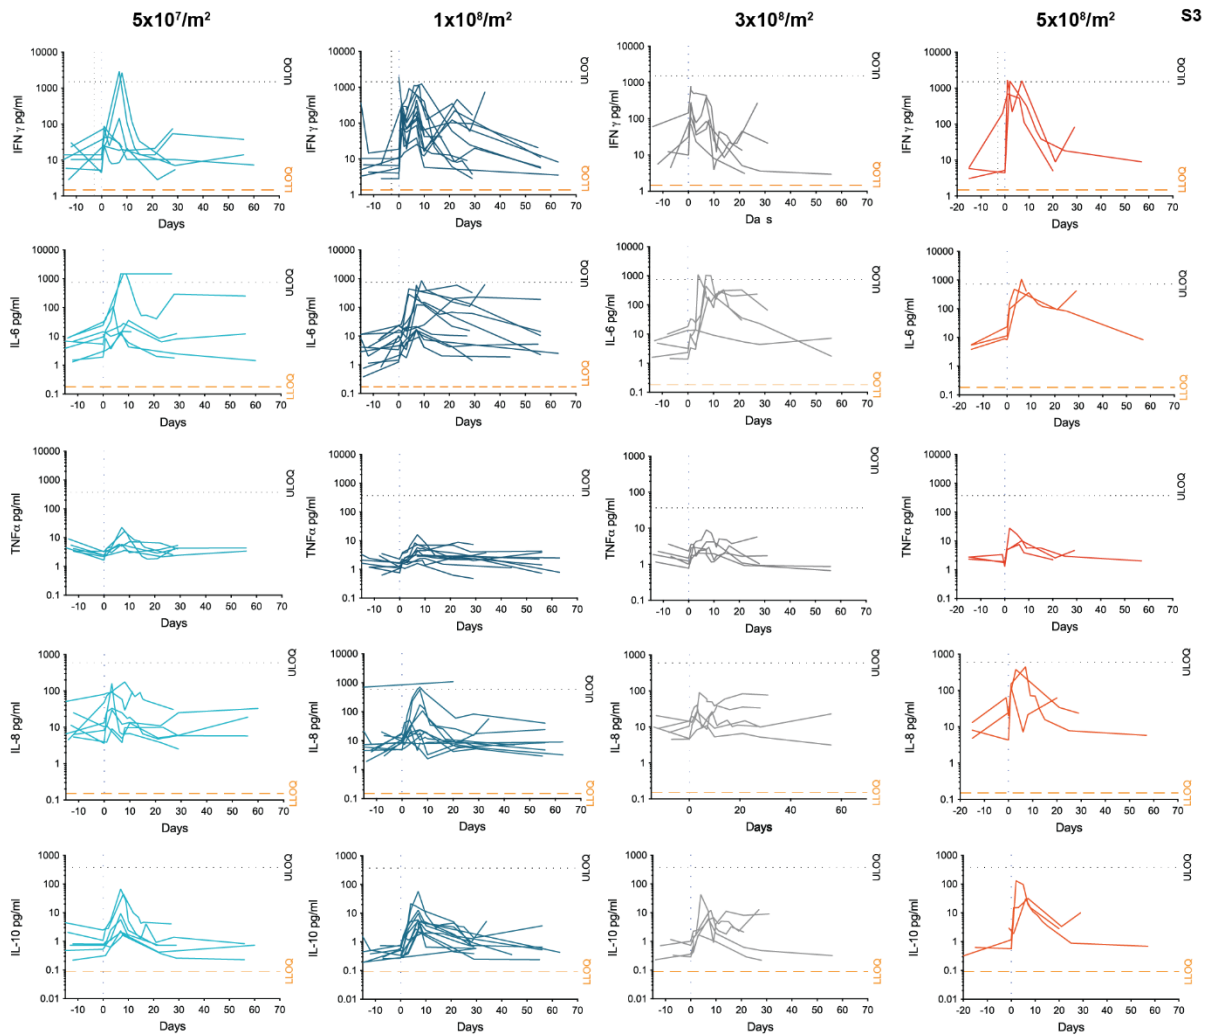

**Supplementary Fig. 3, Kinetics of plasma cytokine release post gavo-cel infusion.** Plasma levels of IFN- $\gamma$ , IL-6, TNF- $\alpha$ , IL-8 and IL-10 by dose level for individual patients as measured longitudinally in the peripheral blood using a validated multiplexed immunoassay (Meso Scale Discovery).



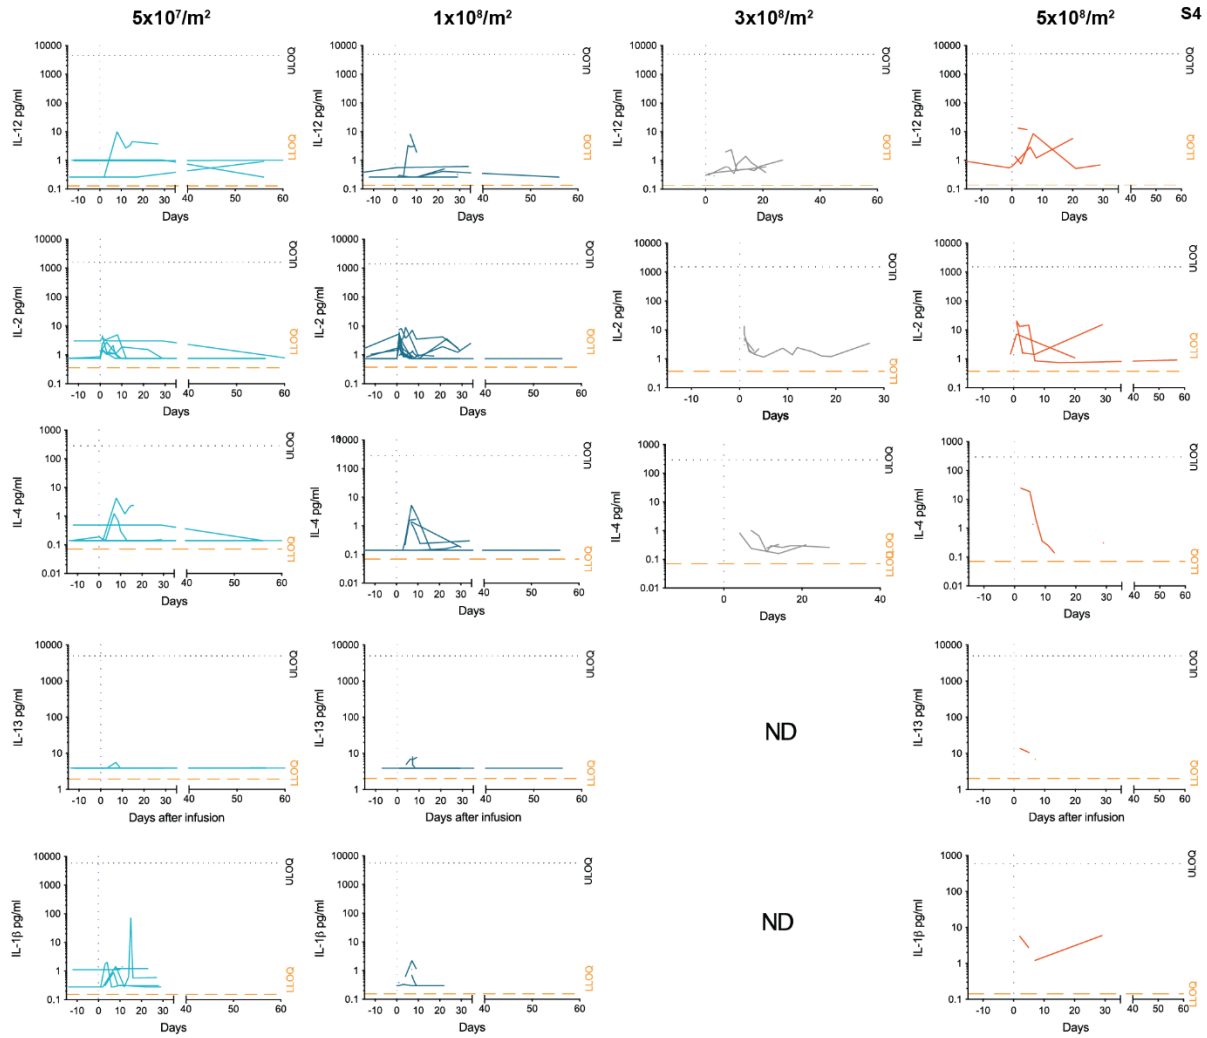

**Supplementary Fig. 4, Kinetics of plasma cytokine release post gavo-cel infusion.** Plasma levels of IL-12, IL-2, IL-4, IL-13 and IL-1 $\beta$  by dose level for individual patients as measured longitudinally in the peripheral blood using a validated multiplexed immunoassay (Meso Scale Discovery). N.D., Not detected.

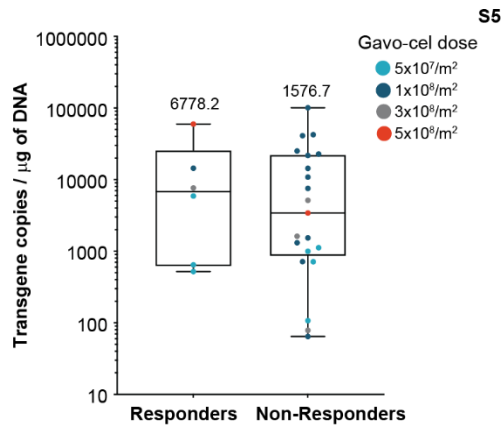

**Supplementary Fig. 5, Gavo-cel expansion in responders vs non-responders.** Comparison of transgene expression ( $C_{\text{max}}$ ) by qRT PCR in responders by RECIST vs. non-responders. The correlation between peak vector transgene copies per microgram of gDNA after gavo-cel infusion and response assessment by RECIST version 1.1 criteria. Horizontal lines and boxes show the medians and interquartile ranges, respectively. (n=29 independent patient samples) For both box-plots; center line, box limits and whiskers represent the median, interquartile range and minima and maxima, respectively.

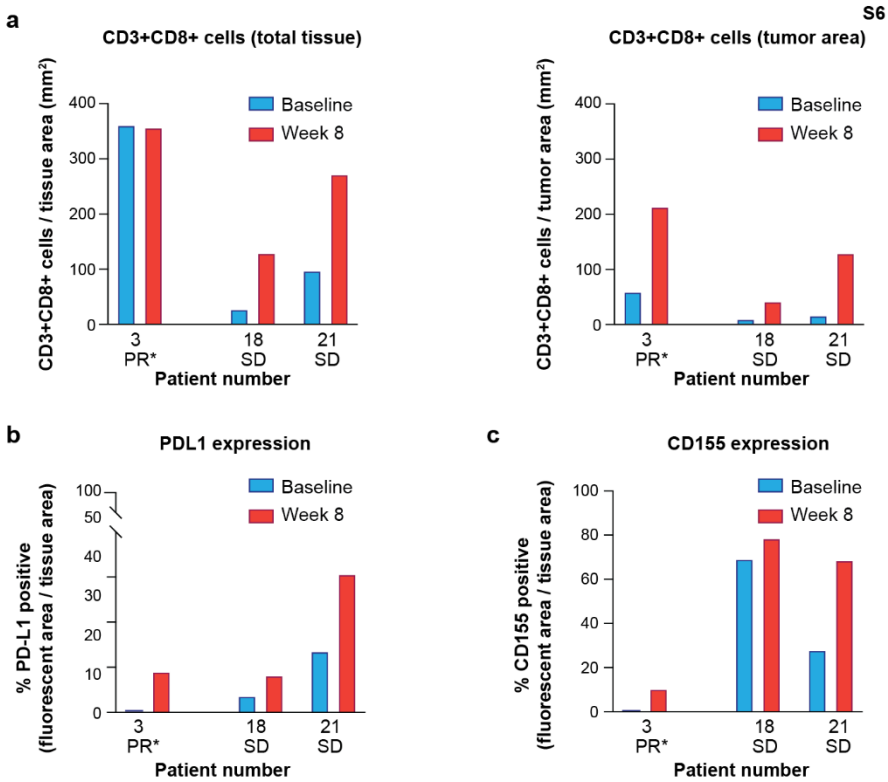

**Supplementary Fig. 6, Quantitative imaging analysis of multiplex immunofluorescence assay.** Multiplex immunofluorescent staining was performed for cytokeratin (tumor marker), CD3 (pan-T cell marker), PD-L1 and CD155 in malignant pleural mesothelioma (MPM) tumor biopsies taken at baseline and at week 8 post gavo-cel infusion. **a**, Numbers of CD3+CD8+ T cells in total tissue vs. tumor area tissue. **b**, Percent positive staining by surface area for PD-L1. **c**, Percent positive staining by surface area for CD155. PR, partial response; SD, stable disease

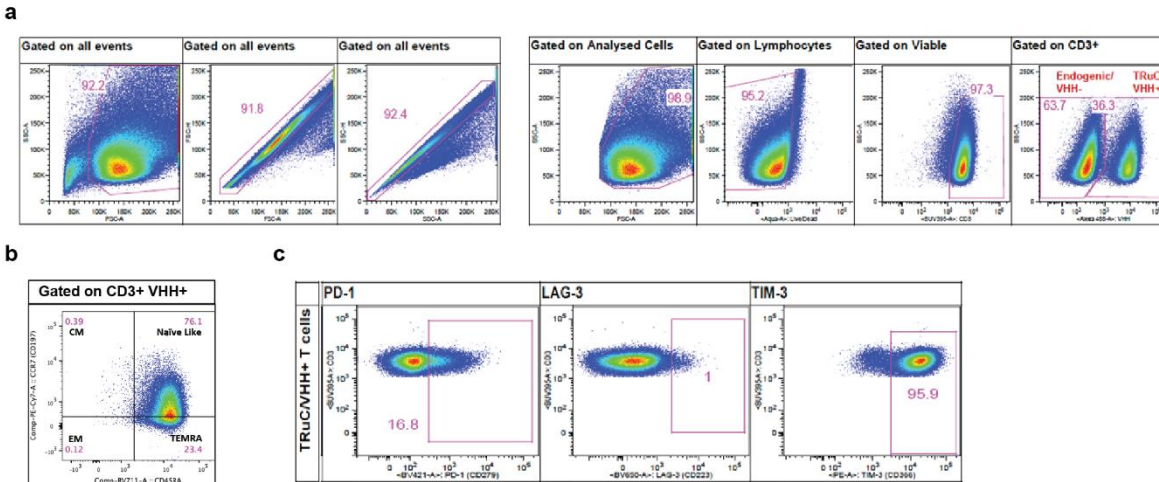

**Supplementary Fig. 7, Representative gating strategy used for analysis of flow cytometry data.** **a**, Overall gating strategy used for identifying TRuC T cells. **b**, after using the strategy defined in (a), CD3+ VHH+ T cells were further defined into memory phenotypes (CM= central memory, EM= effector memory, TEMRA= effector memory cells re-expressing CD45RA). **c**, after using the strategy defined in (a), CD3+ VHH+ T cells were analyzed for expression of PD-1, LAG-3 and TIM-3.
